# Supplementary material
Source: ML conference proceedings conference paper supplement (https://proceedings.mlr.press/v84/zhao18a.html)
Supplement: Supplementary file [file zhao18a-supp.pdf]

# Supplemental Material to “Stochastic Three-Composite Convex Minimization with a Linear Operator”

Renbo Zhao\*

Volkan Cevher<sup>†</sup>

## S-1 Proof of Theorem 1

From (5) and (6), we have

$$\frac{1}{\alpha_k}(\mathbf{y}^k - \mathbf{y}^{k+1}) + \mathbf{A}\mathbf{z}^k \in \partial h^*(\mathbf{y}^{k+1}) \quad (\text{S-1})$$

$$\frac{1}{\tau_k}(\mathbf{x}^k - \mathbf{x}^{k+1}) - (\mathbf{v}^k + \mathbf{A}^T \mathbf{y}^{k+1}) \in \partial g(\mathbf{x}^{k+1}) \quad (\text{S-2})$$

Then we have for any  $\mathbf{x} \in \mathbb{R}^d$  and  $\mathbf{y} \in \mathbb{R}^m$ ,

$$\begin{aligned} h^*(\mathbf{y}) &\geq h^*(\mathbf{y}^{k+1}) + \left\langle \frac{1}{\alpha_k}(\mathbf{y}^k - \mathbf{y}^{k+1}) + \mathbf{A}\mathbf{z}^k, \mathbf{y} - \mathbf{y}^{k+1} \right\rangle \\ &= h^*(\mathbf{y}^{k+1}) + \frac{1}{\alpha_k} \langle \mathbf{y}^k - \mathbf{y}^{k+1}, \mathbf{y} - \mathbf{y}^{k+1} \rangle + \langle \mathbf{A}\mathbf{z}^k, \mathbf{y} - \mathbf{y}^{k+1} \rangle, \\ &= h^*(\mathbf{y}^{k+1}) + \frac{1}{2\alpha_k} (\|\mathbf{y}^k - \mathbf{y}^{k+1}\|^2 + \|\mathbf{y}^{k+1} - \mathbf{y}\|^2 - \|\mathbf{y}^k - \mathbf{y}\|^2) \\ &\quad + \langle \mathbf{A}(\mathbf{x}^k + \theta_k(\mathbf{x}^k - \mathbf{x}^{k-1})), \mathbf{y} - \mathbf{y}^{k+1} \rangle, \end{aligned} \quad (\text{S-3})$$

$$\begin{aligned} g(\mathbf{x}) &\geq g(\mathbf{x}^{k+1}) + \left\langle \frac{1}{\tau_k}(\mathbf{x}^k - \mathbf{x}^{k+1}) - (\mathbf{v}^k + \mathbf{A}^T \mathbf{y}^{k+1}), \mathbf{x} - \mathbf{x}^{k+1} \right\rangle \\ &= g(\mathbf{x}^{k+1}) + \frac{1}{\tau_k} \langle \mathbf{x}^k - \mathbf{x}^{k+1}, \mathbf{x} - \mathbf{x}^{k+1} \rangle - \langle \mathbf{v}^k + \mathbf{A}^T \mathbf{y}^{k+1}, \mathbf{x} - \mathbf{x}^{k+1} \rangle \\ &= g(\mathbf{x}^{k+1}) + \frac{1}{2\tau_k} (\|\mathbf{x}^k - \mathbf{x}^{k+1}\|^2 + \|\mathbf{x}^{k+1} - \mathbf{x}\|^2 - \|\mathbf{x}^k - \mathbf{x}\|^2) \\ &\quad - \langle \mathbf{v}^k, \mathbf{x} - \mathbf{x}^{k+1} \rangle - \langle \mathbf{A}^T \mathbf{y}^{k+1}, \mathbf{x} - \mathbf{x}^{k+1} \rangle. \end{aligned} \quad (\text{S-4})$$

Since  $f$  is convex and  $L$ -smooth, we have for any  $\mathbf{x} \in \mathbb{R}^d$ ,

$$\begin{aligned} f(\mathbf{x}) &\geq f(\mathbf{x}^k) + \langle \nabla f(\mathbf{x}^k), \mathbf{x} - \mathbf{x}^k \rangle \\ &\geq f(\mathbf{x}^{k+1}) - \langle \nabla f(\mathbf{x}^k), \mathbf{x}^{k+1} - \mathbf{x}^k \rangle - \frac{L}{2} \|\mathbf{x}^k - \mathbf{x}^{k+1}\|^2 + \langle \nabla f(\mathbf{x}^k), \mathbf{x} - \mathbf{x}^k \rangle \\ &= f(\mathbf{x}^{k+1}) + \langle \nabla f(\mathbf{x}^k), \mathbf{x} - \mathbf{x}^{k+1} \rangle - \frac{L}{2} \|\mathbf{x}^k - \mathbf{x}^{k+1}\|^2. \end{aligned} \quad (\text{S-5})$$

\*Laboratory for Information and Inference Systems (LIONS), École Polytechnique Fédérale de Lausanne (EPFL), CH1015 - Lausanne, Switzerland. Email: [elezren@nus.edu.sg](mailto:elezren@nus.edu.sg).

<sup>†</sup>Laboratory for Information and Inference Systems (LIONS), École Polytechnique Fédérale de Lausanne (EPFL), CH1015 - Lausanne, Switzerland. Email: [volkan.cevher@epfl.ch](mailto:volkan.cevher@epfl.ch).

Summing (S-3), (S-4) and (S-5) and recalling  $\varepsilon^k = \nabla f(\mathbf{x}^k) - \mathbf{v}^k$ , we have

$$\begin{aligned}
0 &\geq (f(\mathbf{x}^{k+1}) - f(\mathbf{x})) + (g(\mathbf{x}^{k+1}) - g(\mathbf{x})) + (h^*(\mathbf{y}^{k+1}) - h^*(\mathbf{y})). \\
&+ \left( \frac{1}{2\tau_k} - \frac{L}{2} \right) \|\mathbf{x}^k - \mathbf{x}^{k+1}\|^2 + \theta_k \langle \mathbf{A}(\mathbf{x}^k - \mathbf{x}^{k-1}), \mathbf{y}^k - \mathbf{y}^{k+1} \rangle \\
&+ \frac{1}{2\tau_k} (\|\mathbf{x}^{k+1} - \mathbf{x}\|^2 - \|\mathbf{x}^k - \mathbf{x}\|^2) + \frac{1}{2\alpha_k} (\|\mathbf{y}^{k+1} - \mathbf{y}\|^2 - \|\mathbf{y}^k - \mathbf{y}\|^2) \\
&- \langle \mathbf{A}(\mathbf{x}^{k+1} - \mathbf{x}^k), \mathbf{y} - \mathbf{y}^{k+1} \rangle + \theta_k \langle \mathbf{A}(\mathbf{x}^k - \mathbf{x}^{k-1}), \mathbf{y} - \mathbf{y}^k \rangle \\
&+ \frac{1}{2\alpha_k} \|\mathbf{y}^k - \mathbf{y}^{k+1}\|^2 + (\langle \mathbf{A}\mathbf{x}^{k+1}, \mathbf{y} \rangle - \langle \mathbf{A}\mathbf{x}, \mathbf{y}^{k+1} \rangle) + \langle \varepsilon^k, \mathbf{x} - \mathbf{x}^{k+1} \rangle.
\end{aligned} \tag{S-6}$$

Using Cauchy-Schwartz and Young's inequality, we have for any  $\mu_k > 0$ ,

$$\begin{aligned}
\langle \mathbf{A}(\mathbf{x}^k - \mathbf{x}^{k-1}), \mathbf{y}^k - \mathbf{y}^{k+1} \rangle &\geq -B \|\mathbf{x}^k - \mathbf{x}^{k-1}\| \|\mathbf{y}^{k+1} - \mathbf{y}^k\| \\
&\geq -\frac{\mu_k B}{2} \|\mathbf{x}^k - \mathbf{x}^{k-1}\|^2 - \frac{B}{2\mu_k} \|\mathbf{y}^{k+1} - \mathbf{y}^k\|^2.
\end{aligned} \tag{S-7}$$

Define  $\tilde{\mathbf{x}}^{k+1} \triangleq \mathbf{prox}_{\tau_k g}(\mathbf{x}^k - \tau_k(\mathbf{A}^T \mathbf{y}^{k+1} + \nabla f(\mathbf{x}^k)))$ . Using the nonexpansiveness of  $\mathbf{prox}_{\tau_k g}$  in (6), we have

$$\|\tilde{\mathbf{x}}^{k+1} - \mathbf{x}^{k+1}\| \leq \tau_k \|\varepsilon^k\|. \tag{S-8}$$

By (S-8) and Cauchy-Schwartz, we have

$$\begin{aligned}
\langle \varepsilon^k, \mathbf{x} - \mathbf{x}^{k+1} \rangle &= \langle \varepsilon^k, \mathbf{x} - \tilde{\mathbf{x}}^{k+1} \rangle + \langle \varepsilon^k, \tilde{\mathbf{x}}^{k+1} - \mathbf{x}^{k+1} \rangle \\
&\geq \langle \varepsilon^k, \mathbf{x} - \tilde{\mathbf{x}}^{k+1} \rangle - \tau_k \|\varepsilon^k\|^2.
\end{aligned} \tag{S-9}$$

Now, substitute (S-7) and (S-9) into (S-6) and then multiply both sides of (S-6) by  $\tau_k$ , we have

$$\begin{aligned}
&-\tau_k \theta_k \langle \mathbf{A}(\mathbf{x}^k - \mathbf{x}^{k-1}), \mathbf{y} - \mathbf{y}^k \rangle + \frac{\tau_k \theta_k \mu_k B}{2} \|\mathbf{x}^k - \mathbf{x}^{k-1}\|^2 + \frac{1}{2} \|\mathbf{x}^k - \mathbf{x}\|^2 \\
&+ \frac{\tau_k}{2\alpha_k} \|\mathbf{y}^k - \mathbf{y}\|^2 \geq \tau_k (L(\mathbf{x}^{k+1}, \mathbf{y}) - L(\mathbf{x}, \mathbf{y}^{k+1})) - \tau_k \langle \mathbf{A}(\mathbf{x}^{k+1} - \mathbf{x}^k), \mathbf{y} - \mathbf{y}^{k+1} \rangle \\
&+ \left( \frac{1}{2} - \frac{\tau_k L}{2} \right) \|\mathbf{x}^k - \mathbf{x}^{k+1}\|^2 + \tau_k \left( \frac{1}{2\alpha_k} - \frac{\theta_k B}{2\mu_k} \right) \|\mathbf{y}^k - \mathbf{y}^{k+1}\|^2 \\
&+ \frac{1}{2} \|\mathbf{x}^{k+1} - \mathbf{x}\|^2 + \frac{\tau_k}{2\alpha_k} \|\mathbf{y}^{k+1} - \mathbf{y}\|^2 + \tau_k \langle \varepsilon^k, \mathbf{x} - \tilde{\mathbf{x}}^{k+1} \rangle - \tau_k^2 \|\varepsilon^k\|^2.
\end{aligned} \tag{S-10}$$

By choosing  $\mu_k = \theta_k \alpha_k B$  and using conditions (13) and (14), we have

$$\begin{aligned}
&-\tau_k \theta_k \langle \mathbf{A}(\mathbf{x}^k - \mathbf{x}^{k-1}), \mathbf{y} - \mathbf{y}^k \rangle + \frac{\tau_k \theta_k^2 \alpha_k B^2}{2} \|\mathbf{x}^k - \mathbf{x}^{k-1}\|^2 + \frac{1}{2} \|\mathbf{x}^k - \mathbf{x}\|^2 \\
&+ \frac{\tau_k}{2\alpha_k} \|\mathbf{y}^k - \mathbf{y}\|^2 \geq \tau_k (L(\mathbf{x}^{k+1}, \mathbf{y}) - L(\mathbf{x}, \mathbf{y}^{k+1})) \\
&- \tau_{k+1} \theta_{k+1} \langle \mathbf{A}(\mathbf{x}^{k+1} - \mathbf{x}^k), \mathbf{y} - \mathbf{y}^{k+1} \rangle + \frac{\tau_{k+1} \theta_{k+1}^2 \alpha_{k+1} B^2}{2} \|\mathbf{x}^k - \mathbf{x}^{k+1}\|^2 \\
&+ \frac{1}{2} \|\mathbf{x}^{k+1} - \mathbf{x}\|^2 + \frac{\tau_k}{2\alpha_k} \|\mathbf{y}^{k+1} - \mathbf{y}\|^2 + \tau_k \langle \varepsilon^k, \mathbf{x} - \tilde{\mathbf{x}}^{k+1} \rangle - \tau_k^2 \|\varepsilon^k\|^2.
\end{aligned} \tag{S-11}$$

For any  $k \geq 1$ , define  $q_k \triangleq \tau_k / \alpha_k = \tau_{k-1}^2 B^2 / (1 - \tau_{k-1} L)$ . We claim that  $\{q_k\}_{k \geq 1}$  is a (strictly) decreasing sequence. Indeed, from (12), we see that  $\{\tau_k\}_{k \geq 0}$  is strictly decreasing. Then

$$\frac{q_k}{q_{k+1}} = \frac{\tau_{k-1}^2 B^2}{1 - \tau_{k-1} L} \cdot \frac{1 - \tau_k L}{\tau_k^2 B^2} = \frac{\tau_{k-1}}{\tau_k} \cdot \frac{\tau_{k-1} - \tau_{k-1} \tau_k L}{\tau_k - \tau_{k-1} \tau_k L} > 1.$$

Moreover, since  $q_0 > q_1$  (by the choice of  $\alpha_0$ ),  $\{q_k\}_{k \geq 0}$  is (strictly) decreasing. Based on this fact, we take supremum on both sides of (S-11) over any bounded sets  $\mathcal{X}' \subseteq \mathbb{R}^d$  and  $\mathcal{Y}' \subseteq \mathbb{R}^m$  to obtain

$$\begin{aligned}
& - \inf_{\mathbf{y} \in \mathcal{Y}'} \tau_k \theta_k \langle \mathbf{A}(\mathbf{x}^k - \mathbf{x}^{k-1}), \mathbf{y} - \mathbf{y}^k \rangle + \frac{\tau_k \theta_k^2 \alpha_k B^2}{2} \|\mathbf{x}^k - \mathbf{x}^{k-1}\|^2 \\
& + \sup_{\mathbf{x} \in \mathcal{X}'} \frac{1}{2} \|\mathbf{x}^k - \mathbf{x}\|^2 + \sup_{\mathbf{y} \in \mathcal{Y}'} \frac{\tau_k}{2\alpha_k} \|\mathbf{y}^k - \mathbf{y}\|^2 \geq \tau_k G_{\mathcal{X}', \mathcal{Y}'}(\mathbf{x}^{k+1}, \mathbf{y}^{k+1}) \\
& - \inf_{\mathbf{y} \in \mathcal{Y}'} \tau_{k+1} \theta_{k+1} \langle \mathbf{A}(\mathbf{x}^{k+1} - \mathbf{x}^k), \mathbf{y} - \mathbf{y}^{k+1} \rangle + \frac{\tau_{k+1} \theta_{k+1}^2 \alpha_{k+1} B^2}{2} \|\mathbf{x}^k - \mathbf{x}^{k+1}\|^2 \\
& + \sup_{\mathbf{x} \in \mathcal{X}'} \frac{1}{2} \|\mathbf{x}^{k+1} - \mathbf{x}\|^2 + \sup_{\mathbf{y} \in \mathcal{Y}'} \frac{\tau_{k+1}}{2\alpha_{k+1}} \|\mathbf{y}^{k+1} - \mathbf{y}\|^2 + \sup_{\mathbf{x} \in \mathcal{X}'} \tau_k \langle \boldsymbol{\varepsilon}^k, \mathbf{x} - \tilde{\mathbf{x}}^{k+1} \rangle - \tau_k^2 \|\boldsymbol{\varepsilon}^k\|^2.
\end{aligned} \tag{S-12}$$

Using  $\mathbb{E}_{\boldsymbol{\xi}^k} [\mathbf{v}^k | \mathcal{F}_k] = \nabla f(\mathbf{x}^k)$  in Assumption 1 and reverse Fatou's lemma [1], we have

$$\mathbb{E}_{\boldsymbol{\xi}^k} \left[ \sup_{\mathbf{x} \in \mathcal{X}'} \tau_k \langle \boldsymbol{\varepsilon}^k, \mathbf{x} - \tilde{\mathbf{x}}^{k+1} \rangle \mid \mathcal{F}_k \right] \geq \sup_{\mathbf{x} \in \mathcal{X}'} \tau_k \langle \mathbb{E}_{\boldsymbol{\xi}^k} [\boldsymbol{\varepsilon}^k | \mathcal{F}_k], \mathbf{x} - \tilde{\mathbf{x}}^{k+1} \rangle = 0. \tag{S-13}$$

Based on this, we take expectation on the RHS of (S-12) w.r.t.  $\boldsymbol{\xi}_k$  by conditioning on  $\mathcal{F}_k$ ,

$$\begin{aligned}
& - \inf_{\mathbf{y} \in \mathcal{Y}'} \tau_k \theta_k \langle \mathbf{A}(\mathbf{x}^k - \mathbf{x}^{k-1}), \mathbf{y} - \mathbf{y}^k \rangle + \frac{\tau_k \theta_k^2 \alpha_k B^2}{2} \|\mathbf{x}^k - \mathbf{x}^{k-1}\|^2 \\
& + \sup_{\mathbf{x} \in \mathcal{X}'} \frac{1}{2} \|\mathbf{x}^k - \mathbf{x}\|^2 + \sup_{\mathbf{y} \in \mathcal{Y}'} \frac{\tau_k}{2\alpha_k} \|\mathbf{y}^k - \mathbf{y}\|^2 \geq \mathbb{E}_{\boldsymbol{\xi}^k} \left[ \tau_k G_{\mathcal{X}', \mathcal{Y}'}(\mathbf{x}^{k+1}, \mathbf{y}^{k+1}) \right. \\
& - \inf_{\mathbf{y} \in \mathcal{Y}'} \tau_{k+1} \theta_{k+1} \langle \mathbf{A}(\mathbf{x}^{k+1} - \mathbf{x}^k), \mathbf{y} - \mathbf{y}^{k+1} \rangle + \frac{\tau_{k+1} \theta_{k+1}^2 \alpha_{k+1} B^2}{2} \|\mathbf{x}^k - \mathbf{x}^{k+1}\|^2 \\
& \left. + \sup_{\mathbf{x} \in \mathcal{X}'} \frac{1}{2} \|\mathbf{x}^{k+1} - \mathbf{x}\|^2 + \sup_{\mathbf{y} \in \mathcal{Y}'} \frac{\tau_{k+1}}{2\alpha_{k+1}} \|\mathbf{y}^{k+1} - \mathbf{y}\|^2 \mid \mathcal{F}_k \right] - \tau_k^2 \mathbb{E}_{\boldsymbol{\xi}^k} \left[ \|\boldsymbol{\varepsilon}^k\|^2 \mid \mathcal{F}_k \right].
\end{aligned} \tag{S-14}$$

Telescoping (S-14) over  $k = 0, 1, \dots, K-1$ ,

$$\begin{aligned}
& - \inf_{\mathbf{y} \in \mathcal{Y}'} \tau_0 \theta_0 \langle \mathbf{A}(\mathbf{x}^0 - \mathbf{x}^{-1}), \mathbf{y} - \mathbf{y}^0 \rangle + \frac{\tau_0 \theta_0^2 \alpha_0 B^2}{2} \|\mathbf{x}^0 - \mathbf{x}^{-1}\|^2 \\
& + \sup_{\mathbf{x} \in \mathcal{X}'} \frac{1}{2} \|\mathbf{x}^0 - \mathbf{x}\|^2 + \sup_{\mathbf{y} \in \mathcal{Y}'} \frac{\tau_0}{2\alpha_0} \|\mathbf{y}^0 - \mathbf{y}\|^2 \geq \mathbb{E}_{\Xi_k} \left[ \sum_{k=0}^{K-1} \tau_k G_{\mathcal{X}', \mathcal{Y}'}(\mathbf{x}^{k+1}, \mathbf{y}^{k+1}) \right] \\
& + \mathbb{E}_{\Xi_k} \left[ - \inf_{\mathbf{y} \in \mathcal{Y}'} \tau_K \theta_K \langle \mathbf{A}(\mathbf{x}^K - \mathbf{x}^{K-1}), \mathbf{y} - \mathbf{y}^K \rangle + \sup_{\mathbf{x} \in \mathcal{X}'} \frac{1}{2} \|\mathbf{x}^K - \mathbf{x}\|^2 \right. \\
& \left. + \frac{\tau_K \theta_K^2 \alpha_K B^2}{2} \|\mathbf{x}^K - \mathbf{x}^{K-1}\|^2 + \sup_{\mathbf{y} \in \mathcal{Y}'} \frac{\tau_K}{2\alpha_K} \|\mathbf{y}^K - \mathbf{y}\|^2 \right] - \sum_{k=0}^{K-1} \tau_k^2 \mathbb{E}_{\boldsymbol{\xi}^k} \left[ \|\boldsymbol{\varepsilon}^k\|^2 \mid \mathcal{F}_k \right].
\end{aligned} \tag{S-15}$$

Since  $\mathbf{z}^0 = \mathbf{x}^0$ , we have  $\mathbf{x}^0 = \mathbf{x}^{-1}$ . By Young's inequality, we have

$$\begin{aligned}
& \inf_{\mathbf{y} \in \mathcal{Y}'} \langle \tau_K \theta_K \mathbf{A}(\mathbf{x}^K - \mathbf{x}^{K-1}), \mathbf{y} - \mathbf{y}^K \rangle \\
& \leq \frac{\alpha_K \tau_K \theta_K^2 B^2}{2} \|\mathbf{x}^K - \mathbf{x}^{K-1}\|^2 + \inf_{\mathbf{y} \in \mathcal{Y}'} \frac{\tau_K}{2\alpha_K} \|\mathbf{y} - \mathbf{y}^K\|^2 \\
& \leq \frac{\alpha_K \tau_K \theta_K^2 B^2}{2} \|\mathbf{x}^K - \mathbf{x}^{K-1}\|^2 + \sup_{\mathbf{y} \in \mathcal{Y}'} \frac{\tau_K}{2\alpha_K} \|\mathbf{y} - \mathbf{y}^K\|^2.
\end{aligned} \tag{S-16}$$

Since we use option I in Algorithm 1, we have

$$S_K = \sum_{k=0}^{K-1} \tau_k, \quad \bar{\mathbf{x}}^K = \frac{1}{S_K} \sum_{k=1}^K \tau_{k-1} \mathbf{x}^k, \quad \bar{\mathbf{y}}^K = \frac{1}{S_K} \sum_{k=1}^K \tau_{k-1} \mathbf{y}^k.$$

From the joint convexity of  $G_{\mathcal{X}', \mathcal{Y}'}(\cdot, \cdot)$ , we employ Jensen's inequality to obtain

$$S_K \frac{1}{S_K} \sum_{k=0}^{K-1} \tau_k G_{\mathcal{X}', \mathcal{Y}'}(\mathbf{x}^{k+1}, \mathbf{y}^{k+1}) \geq S_K G_{\mathcal{X}', \mathcal{Y}'}(\bar{\mathbf{x}}^K, \bar{\mathbf{y}}^K). \quad (\text{S-17})$$

Based on (S-16), (S-17) and  $\mathbf{x}^{-1} = \mathbf{x}^0$ , we have

$$S_K \mathbb{E}_{\Xi_K} [G_{\mathcal{X}', \mathcal{Y}'}(\bar{\mathbf{x}}^K, \bar{\mathbf{y}}^K)] \leq \frac{1}{2} R_{\mathcal{X}'}^2(\mathbf{x}^0) + \frac{\tau_0}{2\alpha_0} R_{\mathcal{Y}'}^2(\mathbf{y}^0) + \sum_{k=0}^{K-1} \tau_k^2 \mathbb{E}_{\xi^k} [\|\boldsymbol{\varepsilon}^k\|^2 | \mathcal{F}_k].$$

Define  $\tilde{S}_K \triangleq \sum_{k=0}^{K-1} \tau_k^2$ . Using  $\mathbb{E}_{\xi^k} [\|\boldsymbol{\varepsilon}^k\|^2 | \mathcal{F}_k] \leq \sigma^2$  in Assumption 1, we have

$$\mathbb{E}_{\Xi_K} [G_{\mathcal{X}', \mathcal{Y}'}(\bar{\mathbf{x}}^K, \bar{\mathbf{y}}^K)] \leq \frac{1}{2S_K} \left( R_{\mathcal{X}'}^2(\mathbf{x}^0) + \frac{\tau_0}{\alpha_0} R_{\mathcal{Y}'}^2(\mathbf{y}^0) \right) + \frac{\tilde{S}_K}{S_K} \sigma^2. \quad (\text{S-18})$$

## S-2 Proof of Corollary 1

Since  $S_K = K\tau_K$  and  $\tilde{S}_K = K\tau_K^2$ , from (20), we have

$$\begin{aligned} \mathbb{E}_{\Xi_K} [G(\bar{\mathbf{x}}^K, \bar{\mathbf{y}}^K)] &\leq \frac{1}{2K\tau_K} \left( R_g^2(\mathbf{x}^0) + \frac{\tau_K}{\alpha_K} R_{h^*}^2(\mathbf{y}^0) \right) + \tau_K \sigma^2 \\ &\stackrel{\text{(a)}}{=} \frac{R_g^2(\mathbf{x}^0)}{2K\tau_K} + \tau_K \left( \frac{B^2 R_{h^*}^2(\mathbf{y}^0)}{2K(1-L\tau_K)} + \sigma^2 \right) \\ &\stackrel{\text{(b)}}{\leq} \frac{R_g^2(\mathbf{x}^0)}{2K\tau_K} + \tau_K \left( \frac{B^2 R_{h^*}^2(\mathbf{y}^0)}{2K(1-\tilde{r})} + \sigma^2 \right), \end{aligned} \quad (\text{S-19})$$

where (a) follows from the choice of  $\alpha_K$  and (b) follows from  $\tau_K \leq \tilde{r}/L$ . For convenience, for any  $K \geq 1$ , define

$$E_K \triangleq \frac{B^2 R_{h^*}^2(\mathbf{y}^0)}{2K(1-\tilde{r})} + \frac{3}{2} \sigma^2. \quad (\text{S-20})$$

If we choose  $\tilde{a}$ ,  $\tilde{b}$  and  $\tilde{b}'$  as in (21), then (11) becomes

$$\tau_K = \min \left\{ \frac{\tilde{r}}{L}, \frac{R_g(\mathbf{x}^0)}{\sqrt{2KE_K}} \right\} \quad (\text{S-21})$$

and (22) becomes  $L \geq \tilde{r} \sqrt{2KE_K} / R_g(\mathbf{x}^0)$ .

Now let us consider two cases, depending on the value of  $L$ .

**Case I:** Condition (22) holds. In this case,  $\tau_K = \tilde{r}/L$ . Based on (S-19),

$$\begin{aligned} \mathbb{E}_{\Xi_K} [G(\bar{\mathbf{x}}^K, \bar{\mathbf{y}}^K)] &\leq \frac{R_g^2(\mathbf{x}^0)L}{2K\tilde{r}} + \frac{\tilde{r}}{L} E_K \\ &\stackrel{\text{(a)}}{\leq} \frac{R_g^2(\mathbf{x}^0)L}{2K\tilde{r}} + \frac{R_g(\mathbf{x}^0)\sqrt{E_K}}{\sqrt{2K}} \\ &\stackrel{\text{(b)}}{\leq} \frac{R_g^2(\mathbf{x}^0)L}{2K\tilde{r}} + \frac{R_g(\mathbf{x}^0) \left( BR_{h^*}(\mathbf{y}^0) / \sqrt{2K(1-\tilde{r})} + \sqrt{3/2}\sigma \right)}{\sqrt{2K}} \\ &= \frac{R_g^2(\mathbf{x}^0)L}{2K\tilde{r}} + \frac{R_g(\mathbf{x}^0)R_{h^*}(\mathbf{y}^0)B}{2K\sqrt{1-\tilde{r}}} + \frac{\sqrt{3}R_g(\mathbf{x}^0)\sigma}{2\sqrt{K}} \end{aligned} \quad (\text{S-22})$$

where (a) follows from (22) and (b) follows from  $\sqrt{x+y} \leq \sqrt{x} + \sqrt{y}$  for any  $x, y \geq 0$ .

**Case II:** Condition (22) does not hold. Then  $\tau_K = R_g(\mathbf{x}^0)/\sqrt{2KE_K}$ . From (S-19),

$$\begin{aligned} \mathbb{E}_{\Xi_K} [G(\bar{\mathbf{x}}^K, \bar{\mathbf{y}}^K)] &\leq \frac{\sqrt{2E_K}R_g(\mathbf{x}^0)}{\sqrt{K}} \leq \frac{\sqrt{2}R_g(\mathbf{x}^0) \left( BR_{h^*}(\mathbf{y}^0)/\sqrt{2K(1-\tilde{r})} + \sqrt{3/2}\sigma \right)}{\sqrt{K}} \\ &= \frac{R_g(\mathbf{x}^0)R_{h^*}(\mathbf{y}^0)B}{K\sqrt{1-\tilde{r}}} + \frac{\sqrt{3}R_g(\mathbf{x}^0)\sigma}{\sqrt{K}} \end{aligned} \quad (\text{S-23})$$

### S-3 Proof of Corollary 2

In (12), if we choose  $a = \tilde{a}$ ,  $b = \tilde{b}$ ,  $b' = \tilde{b}' + 1$  and  $r = \tilde{r}$ , then for any  $0 \leq k \leq K-1$ ,

$$\tau_k = \min \left\{ \frac{\tilde{r}}{L}, \frac{R_g(\mathbf{x}^0)}{\sqrt{2(k+1)E_{k+1}}} \right\}. \quad (\text{S-24})$$

Similar to the proof of Corollary 1 (shown in Appendix S-2), we consider two cases.

**Case I:** Condition (22) holds. This case coincides with Case I of Appendix S-2.

**Case II:** Condition (22) does not hold. In this case, let  $K'$  be the largest integer from 0 to  $K-2$  such that  $\tau_{K'} = \tilde{r}/L$ , i.e.,

$$K' \triangleq \left\lfloor \frac{1}{3\sigma^2} \left( \frac{L^2 R_g^2(\mathbf{x}^0)}{\tilde{r}^2} - \frac{B^2 R_{h^*}^2(\mathbf{y}^0)}{1-\tilde{r}} \right) \right\rfloor. \quad (\text{S-25})$$

As a result,

$$\begin{aligned} S_K &= \sum_{k=0}^{K'} \frac{\tilde{r}}{L} + \sum_{k=K'+1}^{K-1} \frac{R_g(\mathbf{x}^0)}{\sqrt{B^2 R_{h^*}^2(\mathbf{y}^0)/(1-\tilde{r}) + 3\sigma^2 k}} \\ &\geq (K'+1) \frac{\tilde{r}}{L} + \int_{K'+1}^K \frac{R_g(\mathbf{x}^0)}{\sqrt{B^2 R_{h^*}^2(\mathbf{y}^0)/(1-\tilde{r}) + 3\sigma^2 z}} dz \\ &\geq (K'+1) \frac{\tilde{r}}{L} + R_g(\mathbf{x}^0) \frac{K - (K'+1)}{\sqrt{B^2 R_{h^*}^2(\mathbf{y}^0)/(1-\tilde{r}) + 3\sigma^2 K}} \\ &\geq (K'+1) \left( \frac{\tilde{r}}{L} - \frac{R_g(\mathbf{x}^0)}{\sqrt{B^2 R_{h^*}^2(\mathbf{y}^0)/(1-\tilde{r}) + 3\sigma^2 K}} \right) + \frac{R_g(\mathbf{x}^0)K}{\sqrt{B^2 R_{h^*}^2(\mathbf{y}^0)/(1-\tilde{r}) + 3\sigma^2 K}} \\ &\geq \frac{R_g(\mathbf{x}^0)K}{\sqrt{B^2 R_{h^*}^2(\mathbf{y}^0)/(1-\tilde{r}) + 3\sigma^2 K}}. \end{aligned} \quad (\text{S-26})$$

In addition,

$$\begin{aligned} \tilde{S}_K &= \sum_{k=0}^{K'} \frac{\tilde{r}^2}{L^2} + \sum_{k=K'+1}^{K-1} \frac{R_g^2(\mathbf{x}^0)}{B^2 R_{h^*}^2(\mathbf{y}^0)/(1-\tilde{r}) + 3\sigma^2 k} \\ &\stackrel{(a)}{\leq} \sum_{k=0}^{K-1} \frac{R_g^2(\mathbf{x}^0)}{B^2 R_{h^*}^2(\mathbf{y}^0)/(1-\tilde{r}) + 3\sigma^2 k} \\ &\leq \frac{R_g^2(\mathbf{x}^0)(1-\tilde{r})}{B^2 R_{h^*}^2(\mathbf{y}^0)} + \int_0^{K-1} \frac{R_g^2(\mathbf{x}^0)}{B^2 R_{h^*}^2(\mathbf{y}^0)/(1-\tilde{r}) + 3\sigma^2 z} dz \\ &\leq \frac{R_g^2(\mathbf{x}^0)(1-\tilde{r})}{B^2 R_{h^*}^2(\mathbf{y}^0)} - \frac{R_g^2(\mathbf{x}^0)}{3\sigma^2} \log \left( \frac{B^2 R_{h^*}^2(\mathbf{y}^0)}{1-\tilde{r}} \right) + \frac{R_g^2(\mathbf{x}^0)}{3\sigma^2} \log \left( \frac{B^2 R_{h^*}^2(\mathbf{y}^0)}{1-\tilde{r}} + 3\sigma^2 K \right) \end{aligned}$$

$$\stackrel{(b)}{\leq} \left(1 + \frac{1}{3\sigma^2}\right) \frac{R_g^2(\mathbf{x}^0)(1-\tilde{r})}{B^2 R_{h^*}^2(\mathbf{y}^0)} + \frac{R_g^2(\mathbf{x}^0)}{3\sigma^2} \log \left( \frac{B^2 R_{h^*}^2(\mathbf{y}^0)}{1-\tilde{r}} + 3\sigma^2 K \right) = C_K, \quad (\text{S-27})$$

where in (a) we use the definition of  $K'$  in (S-25) and in (b) we use  $1 - 1/x \leq \log x$  for all  $x > 0$ . Since  $\tau_0/\alpha_0 \leq 2\tau_1/\alpha_1$  and  $\tau_0 \leq \min \left\{ \frac{\tilde{r}}{L}, \frac{R_g(\mathbf{x}^0)\sqrt{1-\tilde{r}}}{B R_{h^*}(\mathbf{y}^0)} \right\}$ , we also have

$$\frac{\tau_0}{\alpha_0} \leq 2 \frac{\tau_0^2 B^2}{1-L\tau_0} \leq 2 \frac{B^2}{1-\tilde{r}} \frac{R_g^2(\mathbf{x}^0)(1-\tilde{r})}{B^2 R_{h^*}^2(\mathbf{y}^0)} = \frac{2R_g^2(\mathbf{x}^0)}{R_{h^*}^2(\mathbf{y}^0)}. \quad (\text{S-28})$$

Using (S-26), (S-27) and (S-28), we obtain (25) from (20).

## S-4 Proof of Theorem 2

We first present a lemma that will be used in our proof. See Appendix S-5 for the proof of this lemma.

**Lemma S-1.** *If the positive sequences  $\{\alpha_k\}_{k \geq 0}$ ,  $\{\tau_k\}_{k \geq 0}$  and  $\{\theta_k\}_{k \geq 0}$  satisfy  $\alpha_0 \geq 1$ ,  $\theta_0 > 0$  and conditions (15), (16) and (17), then for any  $k \geq 1$ ,*

$$\alpha_0 + \frac{\gamma}{2B^2 + 2L + \gamma} k \leq \alpha_k \leq \alpha_0 + \frac{\gamma}{B^2} k, \quad (\text{S-29})$$

$$\frac{1}{B^2 \alpha_0 + L + \gamma k} \leq \tau_k \leq \frac{2B^2 + 2L + \gamma}{(2B^2 + 2L + \gamma)(B^2 \alpha_0 + L) + B^2 \gamma k}. \quad (\text{S-30})$$

In particular, we have  $\alpha_k = \Theta(k)$  and  $\tau_k = \Theta(1/k)$ . Consequently, from (15), we have  $\theta_k = \Theta(1)$ .

### S-4.1 Proof of Part (i)

By the strong convexity of  $g$ , we have for any  $\mathbf{x} \in \mathbb{R}^d$ ,

$$\begin{aligned} g(\mathbf{x}) &\geq g(\mathbf{x}^{k+1}) + \left\langle \frac{1}{\tau_k} (\mathbf{x}^k - \mathbf{x}^{k+1}) - (\mathbf{v}^k + \mathbf{A}^T \mathbf{y}^{k+1}), \mathbf{x} - \mathbf{x}^{k+1} \right\rangle + \frac{\gamma}{2} \|\mathbf{x} - \mathbf{x}^{k+1}\|^2 \\ &= g(\mathbf{x}^{k+1}) + \frac{1}{\tau_k} \langle \mathbf{x}^k - \mathbf{x}^{k+1}, \mathbf{x} - \mathbf{x}^{k+1} \rangle - \langle \mathbf{v}^k + \mathbf{A}^T \mathbf{y}^{k+1}, \mathbf{x} - \mathbf{x}^{k+1} \rangle + \frac{\gamma}{2} \|\mathbf{x} - \mathbf{x}^{k+1}\|^2 \\ &= g(\mathbf{x}^{k+1}) + \frac{1}{2\tau_k} (\|\mathbf{x}^k - \mathbf{x}^{k+1}\|^2 + \|\mathbf{x}^{k+1} - \mathbf{x}\|^2 - \|\mathbf{x}^k - \mathbf{x}\|^2) - \langle \mathbf{v}^k, \mathbf{x} - \mathbf{x}^{k+1} \rangle \\ &\quad - \langle \mathbf{A}^T \mathbf{y}^{k+1}, \mathbf{x} - \mathbf{x}^{k+1} \rangle + \frac{\gamma}{2} \|\mathbf{x} - \mathbf{x}^{k+1}\|^2. \end{aligned} \quad (\text{S-31})$$

Summing (S-3), (S-5) and (S-31), we have for any  $\mathbf{x} \in \mathbb{R}^d$  and  $\mathbf{y} \in \mathbb{R}^m$ ,

$$\begin{aligned} 0 &\geq (f(\mathbf{x}^{k+1}) - f(\mathbf{x})) + (g(\mathbf{x}^{k+1}) - g(\mathbf{x})) + (h^*(\mathbf{y}^{k+1}) - h^*(\mathbf{y})) + \frac{\gamma}{2} \|\mathbf{x} - \mathbf{x}^{k+1}\|^2 \\ &\quad - \langle \mathbf{A}(\mathbf{x}^{k+1} - \mathbf{x}^k), \mathbf{y} - \mathbf{y}^{k+1} \rangle + \theta_k \langle \mathbf{A}(\mathbf{x}^k - \mathbf{x}^{k-1}), \mathbf{y} - \mathbf{y}^k \rangle \\ &\quad + \left( \frac{1}{2\tau_k} - \frac{L}{2} \right) \|\mathbf{x}^k - \mathbf{x}^{k+1}\|^2 + \frac{1}{2\alpha_k} \|\mathbf{y}^k - \mathbf{y}^{k+1}\|^2 + \theta_k \langle \mathbf{A}(\mathbf{x}^k - \mathbf{x}^{k-1}), \mathbf{y}^k - \mathbf{y}^{k+1} \rangle \\ &\quad + \frac{1}{2\tau_k} (\|\mathbf{x}^{k+1} - \mathbf{x}\|^2 - \|\mathbf{x}^k - \mathbf{x}\|^2) + \frac{1}{2\alpha_k} (\|\mathbf{y}^{k+1} - \mathbf{y}\|^2 - \|\mathbf{y}^k - \mathbf{y}\|^2) + \langle -\boldsymbol{\varepsilon}^k, \mathbf{x} - \mathbf{x}^{k+1} \rangle \\ &\quad + (\langle \mathbf{A}\mathbf{x}^{k+1}, \mathbf{y} \rangle - \langle \mathbf{A}\mathbf{x}, \mathbf{y}^{k+1} \rangle) - \langle \mathbf{A}(\mathbf{x}^{k+1} - \mathbf{x}^k), \mathbf{y} - \mathbf{y}^{k+1} \rangle + \theta_k \langle \mathbf{A}(\mathbf{x}^k - \mathbf{x}^{k-1}), \mathbf{y} - \mathbf{y}^k \rangle. \end{aligned} \quad (\text{S-32})$$

Now, substitute (S-7) and (S-9) into (S-32) and rearrange, we have

$$\begin{aligned}
& -\theta_k \langle \mathbf{A}(\mathbf{x}^k - \mathbf{x}^{k-1}), \mathbf{y} - \mathbf{y}^k \rangle + \frac{\theta_k \mu_k B}{2} \|\mathbf{x}^k - \mathbf{x}^{k-1}\|^2 + \frac{1}{2\tau_k} \|\mathbf{x}^k - \mathbf{x}\|^2 + \frac{1}{2\alpha_k} \|\mathbf{y}^k - \mathbf{y}\|^2 \\
& \geq (L(\mathbf{x}^{k+1}, \mathbf{y}) - L(\mathbf{x}, \mathbf{y}^{k+1})) - \langle \mathbf{A}(\mathbf{x}^{k+1} - \mathbf{x}^k), \mathbf{y} - \mathbf{y}^{k+1} \rangle + \left( \frac{1}{2\tau_k} - \frac{L}{2} \right) \|\mathbf{x}^k - \mathbf{x}^{k+1}\|^2 \\
& + \left( \frac{1}{2\alpha_k} - \frac{\theta_k B}{2\mu_k} \right) \|\mathbf{y}^k - \mathbf{y}^{k+1}\|^2 + \left( \frac{1}{2\tau_k} + \frac{\gamma}{2} \right) \|\mathbf{x}^{k+1} - \mathbf{x}\|^2 + \frac{1}{2\alpha_k} \|\mathbf{y}^{k+1} - \mathbf{y}\|^2 \\
& - \langle \boldsymbol{\varepsilon}^k, \mathbf{x} - \tilde{\mathbf{x}}^{k+1} \rangle - \tau_k \|\boldsymbol{\varepsilon}^k\|^2.
\end{aligned} \tag{S-33}$$

Taking supremum on both sides of (S-33) over any bounded sets  $\mathcal{X}' \subseteq \mathbb{R}^d$  and  $\mathcal{Y}' \subseteq \mathbb{R}^m$ , we have

$$\begin{aligned}
& -\inf_{\mathbf{y} \in \mathcal{Y}'} \theta_k \langle \mathbf{A}(\mathbf{x}^k - \mathbf{x}^{k-1}), \mathbf{y} - \mathbf{y}^k \rangle + \frac{\theta_k \mu_k B}{2} \|\mathbf{x}^k - \mathbf{x}^{k-1}\|^2 + \sup_{\mathbf{x} \in \mathcal{X}'} \frac{1}{2\tau_k} \|\mathbf{x}^k - \mathbf{x}\|^2 \\
& + \sup_{\mathbf{y} \in \mathcal{Y}'} \frac{1}{2\alpha_k} \|\mathbf{y}^k - \mathbf{y}\|^2 \geq G_{\mathcal{X}', \mathcal{Y}'}(\mathbf{x}^{k+1}, \mathbf{y}^{k+1}) - \inf_{\mathbf{y} \in \mathcal{Y}'} \langle \mathbf{A}(\mathbf{x}^{k+1} - \mathbf{x}^k), \mathbf{y} - \mathbf{y}^{k+1} \rangle \\
& + \left( \frac{1}{2\tau_k} - \frac{L}{2} \right) \|\mathbf{x}^k - \mathbf{x}^{k+1}\|^2 + \sup_{\mathbf{y} \in \mathcal{Y}'} \frac{1}{2\alpha_k} \|\mathbf{y}^{k+1} - \mathbf{y}\|^2 + \left( \frac{1}{2\alpha_k} - \frac{\theta_k B}{2\mu_k} \right) \|\mathbf{y}^k - \mathbf{y}^{k+1}\|^2 \\
& + \sup_{\mathbf{x} \in \mathcal{X}'} \left( \frac{1}{2\tau_k} + \frac{\gamma}{2} \right) \|\mathbf{x}^{k+1} - \mathbf{x}\|^2 + \sup_{\mathbf{x} \in \mathcal{X}'} -\langle \boldsymbol{\varepsilon}^k, \mathbf{x} - \tilde{\mathbf{x}}^{k+1} \rangle - \tau_k \|\boldsymbol{\varepsilon}^k\|^2.
\end{aligned} \tag{S-34}$$

We choose  $\mu_k = \theta_k \alpha_k B$  and take expectation on the RHS of (S-34) w.r.t.  $\boldsymbol{\xi}^k$  by conditioning on  $\mathcal{F}_k$ . Based on (S-13), we have

$$\begin{aligned}
& -\inf_{\mathbf{y} \in \mathcal{Y}'} \theta_k \langle \mathbf{A}(\mathbf{x}^k - \mathbf{x}^{k-1}), \mathbf{y} - \mathbf{y}^k \rangle + \frac{\theta_k^2 \alpha_k B^2}{2} \|\mathbf{x}^k - \mathbf{x}^{k-1}\|^2 + \sup_{\mathbf{x} \in \mathcal{X}'} \frac{1}{2\tau_k} \|\mathbf{x}^k - \mathbf{x}\|^2 \\
& + \sup_{\mathbf{y} \in \mathcal{Y}'} \frac{1}{2\alpha_k} \|\mathbf{y}^k - \mathbf{y}\|^2 \geq \mathbb{E}_{\boldsymbol{\xi}^k} \left[ G_{\mathcal{X}', \mathcal{Y}'}(\mathbf{x}^{k+1}, \mathbf{y}^{k+1}) \mid \mathcal{F}_k \right] - \tau_k \mathbb{E}_{\boldsymbol{\xi}^k} \left[ \|\boldsymbol{\varepsilon}^k\|^2 \mid \mathcal{F}_k \right] \\
& + \frac{1}{\theta_{k+1}} \mathbb{E}_{\boldsymbol{\xi}^k} \left[ -\inf_{\mathbf{y} \in \mathcal{Y}'} \theta_{k+1} \langle \mathbf{A}(\mathbf{x}^{k+1} - \mathbf{x}^k), \mathbf{y} - \mathbf{y}^{k+1} \rangle + \theta_{k+1} \left( \frac{1}{2\tau_k} - \frac{L}{2} \right) \|\mathbf{x}^{k+1} - \mathbf{x}^k\|^2 \right. \\
& \left. + \sup_{\mathbf{x} \in \mathcal{X}'} \theta_{k+1} \left( \frac{1}{2\tau_k} + \frac{\gamma}{2} \right) \|\mathbf{x}^{k+1} - \mathbf{x}\|^2 + \sup_{\mathbf{y} \in \mathcal{Y}'} \frac{\theta_{k+1}}{2\alpha_k} \|\mathbf{y}^{k+1} - \mathbf{y}\|^2 \mid \mathcal{F}_k \right].
\end{aligned} \tag{S-35}$$

Substitute (15), (16) and (17) into (S-35) and multiply both sides by  $\alpha_k/\alpha_0$ ,

$$\begin{aligned}
& \frac{\alpha_k}{\alpha_0} \left[ -\inf_{\mathbf{y} \in \mathcal{Y}'} \theta_k \langle \mathbf{A}(\mathbf{x}^k - \mathbf{x}^{k-1}), \mathbf{y} - \mathbf{y}^k \rangle + \frac{\theta_k^2 \alpha_k B^2}{2} \|\mathbf{x}^k - \mathbf{x}^{k-1}\|^2 + \sup_{\mathbf{x} \in \mathcal{X}'} \frac{1}{2\tau_k} \|\mathbf{x}^k - \mathbf{x}\|^2 \right. \\
& \left. + \sup_{\mathbf{y} \in \mathcal{Y}'} \frac{1}{2\alpha_k} \|\mathbf{y}^k - \mathbf{y}\|^2 \right] \geq \frac{\alpha_k}{\alpha_0} \mathbb{E}_{\boldsymbol{\xi}^k} \left[ G_{\mathcal{X}', \mathcal{Y}'}(\mathbf{x}^{k+1}, \mathbf{y}^{k+1}) \mid \mathcal{F}_k \right] \\
& + \frac{\alpha_{k+1}}{\alpha_0} \mathbb{E}_{\boldsymbol{\xi}^k} \left[ -\inf_{\mathbf{y} \in \mathcal{Y}'} \theta_{k+1} \langle \mathbf{A}(\mathbf{x}^{k+1} - \mathbf{x}^k), \mathbf{y} - \mathbf{y}^{k+1} \rangle + \sup_{\mathbf{x} \in \mathcal{X}'} \frac{\|\mathbf{x}^{k+1} - \mathbf{x}\|^2}{2\tau_{k+1}} \right. \\
& \left. + \frac{\theta_{k+1}^2 \alpha_{k+1} B^2}{2} \|\mathbf{x}^{k+1} - \mathbf{x}^k\|^2 + \sup_{\mathbf{y} \in \mathcal{Y}'} \frac{\|\mathbf{y}^{k+1} - \mathbf{y}\|^2}{2\alpha_{k+1}} \mid \mathcal{F}_k \right] - \frac{\alpha_k \tau_k}{\alpha_0} \mathbb{E}_{\boldsymbol{\xi}^k} \left[ \|\boldsymbol{\varepsilon}^k\|^2 \mid \mathcal{F}_k \right].
\end{aligned} \tag{S-36}$$

By Lemma S-1, we have

$$\begin{aligned}
\frac{\alpha_k \tau_k}{\alpha_0} & \leq \left( 1 + \frac{\gamma k}{\alpha_0 B^2} \right) \frac{2B^2 + 2L + \gamma}{(2B^2 + 2L + \gamma)(B^2 \alpha_0 + L) + B^2 \gamma k} \\
& \leq \frac{(\alpha_0 B^2 + \gamma)(2B^2 + 2L + \gamma)}{\alpha_0 \gamma B^4} = \bar{c}_1.
\end{aligned}$$

Also,  $\mathbf{z}^0 = \mathbf{x}^0$  implies  $\mathbf{x}^0 = \mathbf{x}^{-1}$ . Now we telescope (S-36) over  $k = 0, 1, \dots, K-1$  to obtain,

$$\begin{aligned} \sup_{\mathbf{x} \in \mathcal{X}'} \frac{1}{2\tau_0} \|\mathbf{x}^0 - \mathbf{x}\|^2 + \sup_{\mathbf{y} \in \mathcal{Y}'} \frac{1}{2\alpha_0} \|\mathbf{y}^0 - \mathbf{y}\|^2 &\geq \mathbb{E}_{\Xi_K} \left[ \sum_{k=0}^{K-1} \frac{\alpha_k}{\alpha_0} G_{\mathcal{X}', \mathcal{Y}'}(\mathbf{x}^{k+1}, \mathbf{y}^{k+1}) \right] \\ &+ \frac{\alpha_K}{\alpha_0} \mathbb{E}_{\Xi_K} \left[ - \inf_{\mathbf{y} \in \mathcal{Y}'} \theta_K \langle \mathbf{A}(\mathbf{x}^K - \mathbf{x}^{K-1}), \mathbf{y} - \mathbf{y}^K \rangle + \frac{\theta_K^2 \alpha_K B^2}{2} \|\mathbf{x}^K - \mathbf{x}^{K-1}\|^2 \right] \\ &+ \sup_{\mathbf{y} \in \mathcal{Y}'} \frac{1}{2\alpha_K} \|\mathbf{y}^K - \mathbf{y}\|^2 + \sup_{\mathbf{x} \in \mathcal{X}'} \frac{1}{2\tau_K} \|\mathbf{x}^K - \mathbf{x}\|^2 \Big] - \bar{c}_1 \sum_{k=0}^{K-1} \mathbb{E}_{\xi_k} [\|\boldsymbol{\varepsilon}^k\|^2 | \mathcal{F}_k]. \end{aligned}$$

Using Young's inequality, we have

$$\inf_{\mathbf{y} \in \mathcal{Y}'} \langle \theta_K \mathbf{A}(\mathbf{x}^K - \mathbf{x}^{K-1}), \mathbf{y} - \mathbf{y}^K \rangle \leq \frac{\theta_K^2 \alpha_K B^2}{2} \|\mathbf{x}^K - \mathbf{x}^{K-1}\|^2 + \sup_{\mathbf{y} \in \mathcal{Y}'} \frac{1}{2\alpha_K} \|\mathbf{y} - \mathbf{y}^K\|^2.$$

Since we use option II in Algorithm 1, we have

$$S_K = \sum_{k=0}^{K-1} \frac{\alpha_k}{\alpha_0}, \quad \bar{\mathbf{x}}^K = \frac{1}{S_K} \sum_{k=1}^K \frac{\alpha_{k-1}}{\alpha_0} \mathbf{x}^k, \quad \bar{\mathbf{y}}^K = \frac{1}{S_K} \sum_{k=1}^K \frac{\alpha_{k-1}}{\alpha_0} \mathbf{y}^k.$$

From the joint convexity of  $G_{\mathcal{X}', \mathcal{Y}'}(\cdot, \cdot)$ , we employ Jensen's inequality to obtain

$$S_K \frac{1}{S_K} \sum_{k=0}^{K-1} \frac{\alpha_k}{\alpha_0} G_{\mathcal{X}', \mathcal{Y}'}(\mathbf{x}^{k+1}, \mathbf{y}^{k+1}) \geq S_K G_{\mathcal{X}', \mathcal{Y}'}(\bar{\mathbf{x}}^{k+1}, \bar{\mathbf{y}}^{k+1}). \quad (\text{S-37})$$

As a result,

$$\begin{aligned} S_K \mathbb{E}_{\Xi_K} [G_{\mathcal{X}', \mathcal{Y}'}(\bar{\mathbf{x}}^{k+1}, \bar{\mathbf{y}}^{k+1})] + \frac{\alpha_K}{2\alpha_0 \tau_K} \mathbb{E}_{\Xi_K} \left[ \sup_{\mathbf{x} \in \mathcal{X}'} \|\mathbf{x}^K - \mathbf{x}\|^2 \right] \\ \leq \frac{1}{2\tau_0} R_{\mathcal{X}'}^2(\mathbf{x}^0) + \frac{1}{2\alpha_0} R_{\mathcal{Y}'}^2(\mathbf{y}^0) + \bar{c}_1 \sum_{k=0}^{K-1} \mathbb{E}_{\xi_k} [\|\boldsymbol{\varepsilon}^k\|^2 | \mathcal{F}_k]. \end{aligned} \quad (\text{S-38})$$

From Lemma S-1, we have for any  $K \geq 2$ ,

$$\begin{aligned} \frac{S_K}{K^2} &\geq \frac{1}{K^2} \sum_{k=0}^{K-1} 1 + \frac{\gamma}{\alpha_0(2B^2 + 2L + \gamma)} k = \frac{1}{K^2} \left( K + \frac{\gamma}{2\alpha_0(2B^2 + 2L + \gamma)} (K-1)K \right) \\ &\geq \frac{\gamma}{2\alpha_0(2B^2 + 2L + \gamma)} \frac{K-1}{K} \geq \frac{\gamma}{4\alpha_0(2B^2 + 2L + \gamma)}. \end{aligned}$$

Thus, for any  $K \geq 1$ ,  $S_K \geq K^2 / \max\{4\alpha_0(2B^2 + 2L + \gamma)/\gamma, 1\} = K^2/\bar{c}'_1$ . Using  $\mathbb{E}_{\xi_k} [\|\boldsymbol{\varepsilon}^k\|^2 | \mathcal{F}_k] \leq \sigma^2$  in Assumption 1, we have

$$\mathbb{E}_{\Xi_K} [G_{\mathcal{X}', \mathcal{Y}'}(\bar{\mathbf{x}}^{k+1}, \bar{\mathbf{y}}^{k+1})] \leq \frac{\bar{c}'_1}{2K^2} \left( \frac{1}{\tau_0} R_{\mathcal{X}'}^2(\mathbf{x}^0) + \frac{1}{\alpha_0} R_{\mathcal{Y}'}^2(\mathbf{y}^0) \right) + \frac{\bar{c}_1 \bar{c}'_1 \sigma^2}{K}. \quad (\text{S-39})$$

Now (26) follows from (S-39) by defining  $c'_1 \triangleq \bar{c}'_1/2$  and  $c_1 \triangleq \bar{c}_1 \bar{c}'_1$ .

## S-4.2 Proof of Part (ii)

Since  $\mathbf{x}^*$  is the (unique) minimizer of (1), there exists  $\mathbf{y}^* \in \mathbb{R}^m$  such that  $(\mathbf{x}^*, \mathbf{y}^*)$  is a saddle point of (4). Choose  $\mathcal{X}' = \{\mathbf{x}^*\}$  and  $\mathcal{Y}' = \{\mathbf{y}^*\}$ . By definition,  $\mathbb{E}_{\Xi_K} [G_{\mathcal{X}', \mathcal{Y}'}(\bar{\mathbf{x}}^{k+1}, \bar{\mathbf{y}}^{k+1})] \geq 0$ , for any  $K \geq 1$ . Thus (S-38) becomes

$$\frac{\alpha_K}{\tau_K} \mathbb{E}_{\Xi_K} [\|\mathbf{x}^K - \mathbf{x}^*\|^2] \leq \frac{\alpha_0}{\tau_0} \|\mathbf{x}^0 - \mathbf{x}^*\|^2 + \|\mathbf{y}^0 - \mathbf{y}^*\|^2 + 2\alpha_0 \bar{c}_1 \sum_{k=0}^{K-1} \mathbb{E}_{\xi_k} [\|\boldsymbol{\varepsilon}^k\|^2 | \mathcal{F}_k].$$



From Lemma S-1, we have for any  $K \geq 1$ ,

$$\begin{aligned} \frac{1}{K^2} \frac{\alpha_K}{\tau_K} &\geq \frac{1}{K^2} \left( \alpha_0 + \frac{\gamma}{2B^2 + 2L + \gamma} K \right) \left( B^2 \alpha_0 + L + \frac{B^2 \gamma}{2B^2 + 2L + \gamma} K \right) \\ &\geq \frac{B^2 \gamma^2}{(2B^2 + 2L + \gamma)^2} = \frac{1}{c_2}. \end{aligned}$$

Based on  $\mathbb{E}_{\xi_k} [\|\varepsilon^k\|^2 | \mathcal{F}_k] \leq \sigma^2$  in Assumption 1, we have for any  $K \geq 1$ , Combining these, we have

$$\mathbb{E}_{\Xi_K} [\|\mathbf{x}^K - \mathbf{x}^*\|^2] \leq \frac{c_2}{K^2} \left( \frac{\alpha_0}{\tau_0} \|\mathbf{x}^0 - \mathbf{x}^*\|^2 + \|\mathbf{y}^0 - \mathbf{y}^*\|^2 \right) + \frac{2\alpha_0 \bar{c}_1 c_2 \sigma^2}{K}. \quad (\text{S-40})$$

Then (28) follows from (S-40) by defining  $c'_2 \triangleq 2\bar{c}_1 c_2$ .

## S-5 Proof of Lemma S-1

It suffices to show (S-29), since (S-30) straightforwardly follow from (18). From (19), for any  $k \geq 0$ , we have

$$\begin{aligned} \alpha_{k+1} &= \frac{\sqrt{L^2 + 4B^2(B^2\alpha_k^2 + (L + \gamma)\alpha_k)} - L}{2B^2} \\ &= \frac{2(B^2\alpha_k^2 + (L + \gamma)\alpha_k)}{\sqrt{L^2 + 4B^2(B^2\alpha_k^2 + (L + \gamma)\alpha_k)} + L}. \end{aligned} \quad (\text{S-41})$$

Since

$$\begin{aligned} 2B^2\alpha_k + L &= \sqrt{L^2 + 4B^2(B^2\alpha_k^2 + L\alpha_k)} \leq \sqrt{L^2 + 4B^2(B^2\alpha_k^2 + (L + \gamma)\alpha_k)} \\ &\leq \sqrt{(L + \gamma)^2 + 4B^2(B^2\alpha_k^2 + (L + \gamma)\alpha_k)} = 2B^2\alpha_k + L + \gamma, \end{aligned}$$

from (S-41), we have

$$\alpha_k + \frac{\gamma\alpha_k}{2B^2\alpha_k + 2L + \gamma} \leq \alpha_{k+1} \leq \alpha_k + \frac{\gamma\alpha_k}{B^2\alpha_k + L} \leq \alpha_k + \frac{\gamma}{B^2}. \quad (\text{S-42})$$

Since  $\alpha_0 \geq 1$ , then  $\{\alpha_k\}_{k \geq 0}$  is strictly increasing and  $\alpha_k \geq 1$ , for any  $k \geq 0$ . As a result,

$$\alpha_k + \frac{\gamma\alpha_k}{2B^2\alpha_k + 2L + \gamma} \geq \alpha_k + \frac{\gamma}{2B^2 + 2L + \gamma}. \quad (\text{S-43})$$

Combining (S-42) and (S-43), we obtain (S-29).

## References

- [1] M. Muresan, *A Concrete Approach to Classical Analysis*. Springer-Verlag New York, 2009.
